# Supplementary material for: Genome-wide sRNA and mRNA transcriptomic profiling insights into carbapenem-resistant Acinetobacter baumannii
Source: Front Cell Infect Microbiol. 2024 Jul 30;14:1419989. doi: 10.3389/fcimb.2024.1419989 (PMC11362675; doi:10.3389/fcimb.2024.1419989)
Supplement: Supplementary file 3 [file Table2.xlsx]

## Sheet: Sheet1
ID	Sequence	S1_FPKM	S2_FPKM	S3_FPKM	R1_FPKM	R2_FPKM	R3_FPKM	R4_FPKM	S1_count	S2_count	S4_count	R1_count	R2_count	R3_count	R4_count	S mean	R mean	log2(FC)	adjusted Pvalue
sRNA1	CTTATCTACATTAATCGTCATTGGACTTAATTCATGTTCGGCAGTCAAATAACTATCTTCATCGATAATTT	199.34	147.71	183.92	180.55	271.86	211.6	260.2	182	147	252	232	433	287	230	176.99	231.053	0.657397	0.114007
sRNA2	GTGGAGATGGCGGGAGTTGAACCCGCGTCCGCCAGCACTACGCTCGAGAATACTACATGCTTAGATATCGTCTATTGTTTTAACACCAAGTGACCCGACGAACAGGGTACAAGGTGCGATCCTCTAAGTTTGGTATAAAGCCCCGAGGCTTGACTCTATACGGACTTGTGTGCGTGCGCTTCAGTCGGGTTCCCAGACCACAAGTATTCTAGGAAGCGGACAAGCGGCCCTTAGGCAGCTAGAGCGTAAGTTTCGTCGTTTGCGACTATTTAAATGCAAATTTTATTTACGAGAGAAAATGCGCTCTCGGCATGCATCTATGAGTTTCAT	533735	592285	640475	829862	809728	841542	818218	1072070	1296740	1930583	2345947	2837327	2511111	1591127	588832	824837	0.831258	0.000329923
sRNA3	CAACGTGTGCGTAGTGACGAGTTGGAGAATCGTATTCTACGTGTGATGTATTAATT	664.83	371.79	553.23	185.22	182.08	159.25	192.33	607	370	758	238	290	216	170	529.95	179.72	-2.66702	0.00460004
sRNA4	TAAGTTAACAAAGTACAGTTTCATGTAACGAAATTGTACTTTTTATACAAATTACTGTAAACGGTAGCGTAGTATTCAACATACTGCGCTACCGTTTTGTATTTAAACAGGTTATTATCAAACGACTTAGAGTAGT	760.12	497.4	310.19	110.51	116.78	139.35	140.28	694	495	425	142	186	189	124	522.57	126.73	-3.49401	0.0153285
sRNA5	GTTTGGGATGATAATTTAAAAAAATGTCAAACTCTAAGCTAGAATGACTTTCAGACGCAGCGTGATGAATAAGAAGAAGATTCAACAAGATAAGAAGAATAATATCACGCTTTATTTTTTAATGTGCAATTTTTTCAAATTCAATGAGTTTCTC	290.18	126.26	129.38	67.46	63.6	42.37	79.34	272	129	182	89	104	59	72	181.94	63.1925	-2.60809	0.0500014
sRNA6	AATAACGCGCCGTTAAAGGAATATCGTACTGTACTGTCTGGTTAGAACTTACTGTACCAATATCTAGTTTGTTTCCTTTTCGAATAGGATTGTTCGCGCCATTCATATTCCATAACAATTCCAC	199.34	33.16	2.92	39.69	37.04	15.48	38.47	182	33	4	51	59	21	34	78.4733	32.67	-2.16123	0.414861
sRNA7	ATAACGGCTGCGACCACGACCTCGGCCACCTGAGCGACCGCGATCATCATCTTCATCGTCGTCATCACGACGGCTGCG	497.26	7962.42	2785.85	630.37	1550.78	1254.85	550.95	454	7924	3817	810	2470	1702	487	3748.51	996.737	-3.26693	0.201039
sRNA8	AGGAAGGTGACCTCACCTTCCTAAATCAAAATATAAGCATAAAATTCAATAAAATATGAGGGAATTCTG	185.1	536.59	237.93	84.83	103.59	118.7	109.74	169	534	326	109	165	161	97	319.873	104.215	-2.76588	0.0659257
sRNA9	TCACCTTCCTAAATGATCGACCGCATCAAAGAACAACTACAAACGATTAACGTTGTTGGTTGTTATTTGAGTTTTGTTGGCCAGAATCTTTTTGATTAGAT	630.88	3708.9	1028.36	446.71	1792.5	1616.12	582.63	576	3691	1409	574	2855	2192	515	1789.38	1109.49	-1.17882	0.487084
sRNA10	ATGTACTTAAGGTAATCGTAATATCTCCTCGATCCACAGGGAAACTTGGGACAGGGTAAAAGATACGATAAGACCTTATAAACAGCTAGCAAAGAGCAAATAAAAATGGATAGACACATTTTTTGAGTGCTCAACGTTGCAGAAAAGCCCGTG	1215.55	6904.89	3197.76	2855.05	2992.73	6590.7	3252	1132	7009	4469	3742	4862	9118	2932	3772.73	3922.62	0.0960873	0.935073
sRNA11	CGTTTCACGGGCTTTTCTGCAACGTTGAGCACTCAAAAAATGTGTCTATCCATTTTTATTTGCTCTTTGCTAGCTGTTTATAAGGTCTTATCGTATCTTTTACCCTGTCCCAAGTTTCC	269.44	2032.81	1062.67	1078.63	1394.44	2935.11	1684.54	246	2023	1456	1386	2221	3981	1489	1121.64	1773.18	1.12952	0.357414
sRNA12	GCGGATCTCATCATCACGTCCAATCACCGGATCAAGTTTCCCCGATAAAGCCCGCTCGGTTAAATCAATCGTATATTTATTAAGTGAGTCACGTTGGTCTTCGTGATTATTACTCATGACTTTGTC	105.15	60.29	142.32	143.2	237.33	140.08	197.98	96	60	195	184	378	190	175	102.587	179.648	1.38184	0.0729981
sRNA13	GAAGGGGATTGGGGTGACGCCATAATAAATTAATAAAAGGAAACTCAAAAAAGAAAGTATAAGGGAAAAGAGACCAAAATAATAAAAAACTAGAATCTCGAGAGGAAGTTTGCACATTTAAAACCGGAATATTTTAT	5.48	1	105.83	2.33	446.4	281.64	46.38	5	1	145	3	711	382	41	37.4367	194.187	4.05996	0.269948
sRNA14	GTGTGCTTTTCTACATTAAGCGCATAGCCTAACTTTTTTTGTTTTTGAGGGGGCTGTAACAAATATTTAATTATTGTTACGCTTATTTTTTACTCAATACGAAGAAAT	164.29	154.75	132.83	49.81	72.2	46.45	58.83	150	154	182	64	115	63	52	150.623	56.8225	-2.40428	0.000273111
sRNA15	ATGATAAAATGCTCACGGCTTCGTGGGCATTTTTTTTGTGCTTCTAATTGGTTTTAATCCGTAGACTTGAAATT	300.11	371.79	213.12	31.13	60.9	76.68	74.67	274	370	292	40	97	104	66	295.007	60.845	-3.89348	0.00214093
sRNA16	CCAGGCGAGTTTGTATACTATTTTTATAGTGTAGATAACTCAAAAGTTCTGCTTTTTAAAAAGTAGTTCTATACGAGAATTTGCGAAATTTTT	198.25	336.62	467.84	306.62	372.31	243.3	351.84	181	335	641	394	593	330	311	334.237	318.517	-0.118807	0.838836
sRNA17	GTGATTCATAATATTTGCAAATTCTGTCGTTAATTTACCCGAACGGCATTGTAATTCGGAC	208.1	100.48	208.74	77.82	118.03	77.41	106.34	190	100	286	100	188	105	94	172.44	94.9	-1.47294	0.0624791
sRNA18	AGCTGCCGAGCGGCCAAATGGGTTTTGACCGCCATTGTTTGGTGCATAAGGGTTATTAGCTGCTAATTTTTTTTTTGATCCCAATTTACGGAATACAAAGAAAGCTACAGCGGCTGCAAGTAATACCCAAAGCCAGCCAGGGATACCACCTTTTTTCTCTTCTTGGGCTTGAACAGCTTGTTCATTACCCGGTTGAGTTACTTGGTGTTCAGCTGATGTTGATTTGTCATCTGCTAAAGCATTTGCTGCAACAGCACCTACGGCAG	610.23	453.32	884.88	460.8	1895.57	656.9	510.37	988	800	2150	1050	5354	1580	800	649.477	880.91	0.751701	0.602628
sRNA19	CGCAAGCAAGACAATTGCTGTTTTTAAGACGATCGGCCAAGTTTGGGCATGATCAAATTAGATTGATATGGGAATAAAGCT	1796.26	1054.09	755.4	356.43	448.28	314.08	399.36	1640	1049	1035	458	714	426	353	1201.92	379.538	-2.84296	0.0253937
sRNA20	TCAAAACTAAATAGGGCATCGTCAGCTTAAGTGCTATGCTATCGTCAATTTCTTTTTAAAGTCA	186.2	215.04	307.27	143.97	122.43	141.56	194.59	170	214	421	185	195	192	172	236.17	150.637	-1.10904	0.0613388
sRNA21	ATTTAAACGGTTATTGAAGGGTGGAACAGGAATACTTTTAGATTGGCGAATTTCTTCTACTAAATCATGAACGAAAGTTTCA	185.1	47.23	216.04	25.68	23.23	20.64	23.76	169	47	296	33	37	28	21	149.457	23.3275	-4.58085	0.0336257
sRNA22	CTTAAAGTACATCGCGAAACGATTGCCTTCGATCCCTTCAATAATGTCACACGTCC	161.01	40.19	148.89	27.24	18.21	11.8	20.36	147	40	204	35	29	16	18	116.697	19.4025	-4.42498	0.0298666
sRNA23	CTGCCCCCGCAACGGTAACAATGTAAAGCATATTTTTAAGTCGTTCTCGACTTACACCACTGCAGTGATGTGGGAAGGTGAATATGTCCATAAATTAAATATGGCGCTGAAGTCCGGAGACCTACTTGTTTCATCTATCTACCCG	295.73	195.95	129.18	67.71	65.3	39.08	50.91	270	195	177	87	104	53	45	206.953	55.75	-3.23484	0.0145142
sRNA24	GGTCTTTCCGTCTAGCCGCGGGTACACTGCATCTTCACAGCGATTTCGATTTCACTGAGCCTCTGCT	1.1	0	7.3	3.89	1.26	3.69	1.13	1	0	10	5	2	5	1	2.8	2.4925	-0.286913	0.88922
sRNA25	GTCCCCAGCTTACATCATCAATCATGTATCTTTTATCTATAACTTCAACCAGTCAAAGTCATGGTGGGTCTGACAAGACTTGAACTTGTGACCCCACGCTTATCAAGCGTGTGCTCTAAC	2818.15	2399.58	2621.64	1183.69	1466.02	805.11	1140.37	2573	2388	3592	1521	2335	1092	1008	2613.12	1148.8	-2.02688	0.000579501
sRNA26	GCACAGAGTTAGCCGGTGCTTATTCTGCGAGTAACGTCCACTATCCCTAGGTATTAACTAGAGTAGCC	43.81	17.08	89.04	80.16	45.2	52.35	47.52	40	17	122	103	72	71	42	49.9767	56.3075	0.29416	0.764472
sRNA27	AAGCCGCAATCATATCTGCACGGCTAATGATTCCAATCAGTTTTCGTTCCTCAACCACCGGAATATAGTTAAAAGACTTCTCAACAAAGTAAGGTACAAGGTCTTGAATCGGCTGAGTTGGCAGTACAGTAACTACTCGACGACTCATAATTTGTCTTACATAATGCTGCCATGAGTTTCTTGGATCTGTTGCCCCTTTAAACCATTCCACAACTTCATATAGCGCC	282.99	154.71	236.32	100.79	139.81	44.33	86.72	391	233	490	196	337	91	116	224.673	92.9125	-2.17772	0.0198577
sRNA28	TTTTATTTAAAAAGACTAATGGAGGGATCTATCGATTAGTCAAAAATAATTTTAGGGACTTATGGTTTTTTTGTTTCATGAACCCTAGTTCTTTTTAACTCCCAAACGGTTATGTCACCTCTTTTGTAC	205.91	157.76	186.84	231.14	231.05	81.84	323.56	188	157	256	297	368	111	286	183.503	216.897	0.412346	0.603738
sRNA29	GCACATCGCCTGTGTTTTTCTGAGCAAAAGATGAGAAGCTTTGCTTCGAATTAAAGCATAAGTCTATTTTTTATA	1086.52	1247.02	1326.15	386.78	479.67	320.72	437.82	992	1241	1817	497	764	435	387	1219.9	406.248	-2.71185	9.20914e-05
sRNA30	TGATCATGCGGGTCTCATTTCAACGTCCATTGTCACATCCTTGCAAATAAACTTATCTTAAGTTTATTT	79.96	65.32	66.42	54.48	882.12	39.08	59.96	73	65	91	70	1405	53	53	70.5667	258.91	3.206	0.478268
sRNA31	CCTCACGTAATAAAACAAATGTAACCATTACCATCGCTAGACTTAGTGCAGTTAAATAAC	270.53	372.8	494.11	326.08	397.43	213.81	403.88	247	371	677	419	633	290	357	379.147	335.3	-0.303102	0.58512
sRNA32	CTTCAATCTAAATTCATATACCAAAACGCTTGATTCAGTTAATTTGCTAGTTCTCAATTCATCTAGATTAATTGCTTAACCTAAACTCTTGAGTGAACAATTTATTTCAGACTCAATTTTGCCAATCTGTTAATGAGTTAATGTGTCTTCG	7549.81	4452.94	3979.64	1744.84	2575.2	1256.79	2166.75	6939	4461	5489	2257	4129	1716	1928	5327.46	1935.89	-2.49665	0.0190471
sRNA33	CCTTCATGTTGTAAGAAATAACGCTTTGCAAGGAAATCTATCTATGCGAAGCGATGTTTTAAAGTAAACGAGAACTAAACTCGAAATAAAACA	193.86	158.77	108.02	87.94	91.04	61.93	70.14	177	158	148	113	145	84	62	153.55	77.7625	-1.67799	0.0197111
sRNA34	GCAACTTGAGACTTTGCTTGTTCAGCAGATATCACCAGTTGGCCAAGTGTTTCTATTTGCTCTGGGCTAATCTCAATACAACTGTCACCCTGCAAGCTCGCTTCAATCAGCTGCTGCAAAAAACAAGCTGCCTCTGGAGCTTGTGTCTGTGCAGTAAACGGGG	138.09	143.33	179.33	97.4	63.55	48.85	55.18	137	155	267	136	110	72	53	153.583	66.245	-2.07387	0.0034453
sRNA35	TTCGATTTTGCTTTGTTTTCGGTTTATCGCATGTTGCTATGCTTTGTTTCTGAAAAGAAAGTTTCGTCTAATAAACCATTAGGCGATTTATAGAAGGGGC	1150.04	1000.83	761.24	248.26	406.84	461.54	307.72	1050	996	1043	319	648	626	272	970.703	356.09	-2.4733	0.00258146
sRNA36	GTGGTCGTGTTTGTGAGCTTTGAAGTGACCTTGTAAATCATTGATTTGAGCAGTCAATAAAGCTACTTGTACTTCTG	3395.37	3007.51	1761.14	708.97	1063.57	1246	855.28	3100	2993	2413	911	1694	1690	756	2721.34	968.455	-2.54813	0.0100555
sRNA37	CAAGTAAGGATGCACTAAGCTGATATGGAACGACATCACGGATAAGATGTTAGAACGGAAGCGATAAAAAGAATTATATACCCTGAAAGCACAACCTCATTTACCCGAGTTTTGCAGGACGCAGAACTCGGGTTGATATTTTATAGATATATCATTTAATTCGTTGTAAATAAAACCAATATTTTTAAGGTATTCTTAATTTTAAAATCTACTTAATTATAAGTCATCGTCCATAAATTTTTTT	103.02	211.27	85.7	45.45	36.28	98.35	53.55	153	342	191	95	94	217	77	133.33	58.4075	-2.03564	0.0966171
sRNA38	ATCCGTTTACATTTAGTATGACTGGCCACAGATTTGCTGTTGGCTAAATCAATGGA	1363.62	891.3	734.23	323.75	278.76	224.13	294.14	1245	887	1006	416	444	304	260	996.383	280.195	-3.12887	0.00656882
sRNA39	ATTGTTGAACAATCAAGCTTGCTATCTTGCTTTTTTAGGAGCAAAATGCGCATCAGCCACCTAGCCG	703.17	365.77	343.76	118.29	150.05	89.95	105.21	470.9	642	364	471	152	239	122	93	115.875	-3.45809	0.0154599
sRNA40	CCCCTAACTTGCAACTTTAAAATGACGTAAAGGAGATTCTTTTAAACTATGTACCAAGTAAGCTTTACATGGTGCATGTTTAAGAATGTCATCAACATT	1707.54	1514.31	2131.17	1082.52	1059.8	706.31	1299.89	1784.34	1559	1507	2920	1391	1688	958	1149	1037.13	-1.33819	0.0164224
